# Supplementary material for: CO2 emission free co-generation of energy and ethylene in hydrocarbon SOFC reactors with a dehydrogenation anode
Source: Royal Society of Chemistry journal article supplement (doi:10.1039/c1cp22837d), 2011-01-01
Supplement: c1cp22837d.pdf [file c1cp22837d.pdf]

## Electronic Supplementary Information

### **CO<sub>2</sub> emission free co-generation of energy and ethylene in hydrocarbon SOFC reactors with a dehydrogenation anode**

Xian-Zhu Fu,<sup>a</sup> Jie-Yuan Lin<sup>a</sup>, Shihong Xu,<sup>b</sup> Jing-Li Luo,<sup>a,\*</sup> Karl T. Chuang,<sup>a</sup> Alan R. Sanger,<sup>a</sup> Andrzej Krzywicki<sup>c</sup>

*<sup>a</sup>Department of Chemical and Materials Engineering, University of Alberta, Edmonton,  
Alberta T6G 2G6, Canada*

*<sup>b</sup>Alberta Centre for Surface Engineering and Science, University of Alberta, Edmonton,  
Alberta T6G 2G6, Canada*

*<sup>c</sup>NOVA Chemicals Corp., Calgary, Alberta, T2P 5C6, Canada*

\* To whom correspondence should be addressed.

Tel: 1-780-492-2232

Fax: 1-780-492-2881

E-mail: [Jingli.Luo@ualberta.ca](mailto:Jingli.Luo@ualberta.ca)

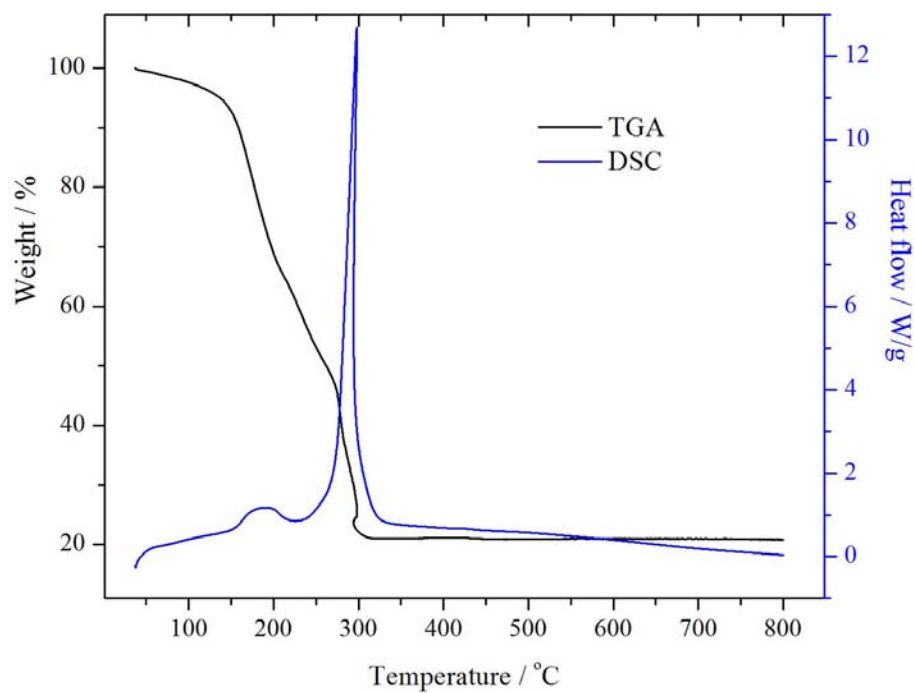

Fig. S1. TGA-DSC curves for Cr-Cu-citrate-nitrate dry gel.

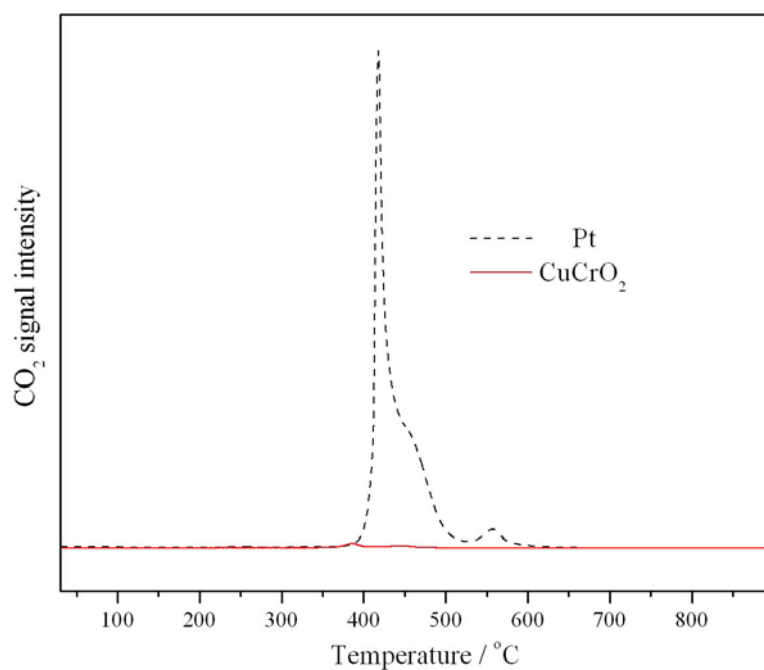

Fig. S2. O<sub>2</sub>-TPO curves of CuCrO<sub>2</sub> and Pt anode catalyst powders after exposure in ethane at 700 °C for 10 h.

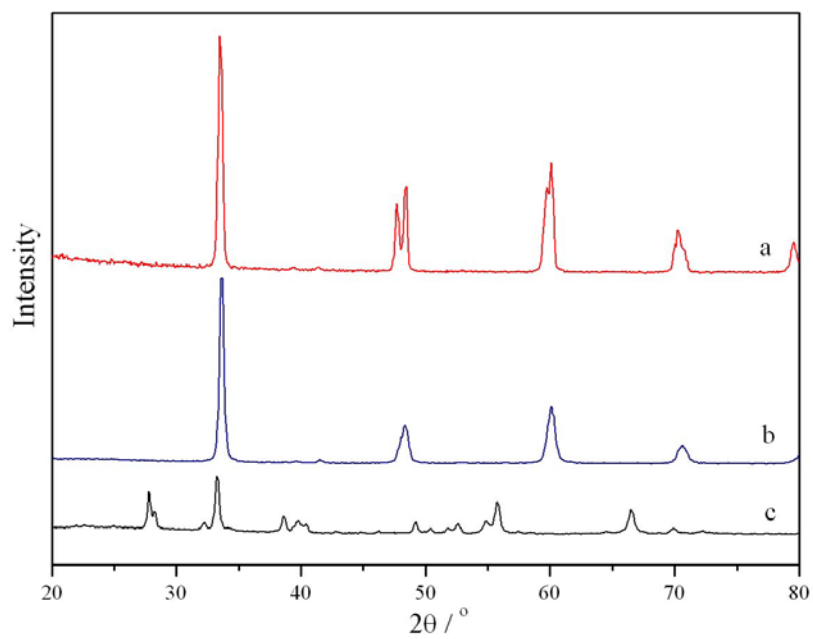

Fig. S3. XRD patterns of (a) BCZY membrane after sintering at 1600 °C, (b) BCZY powders after calcination at 1100 °C, (c) BCZY precursor powder after combustion.

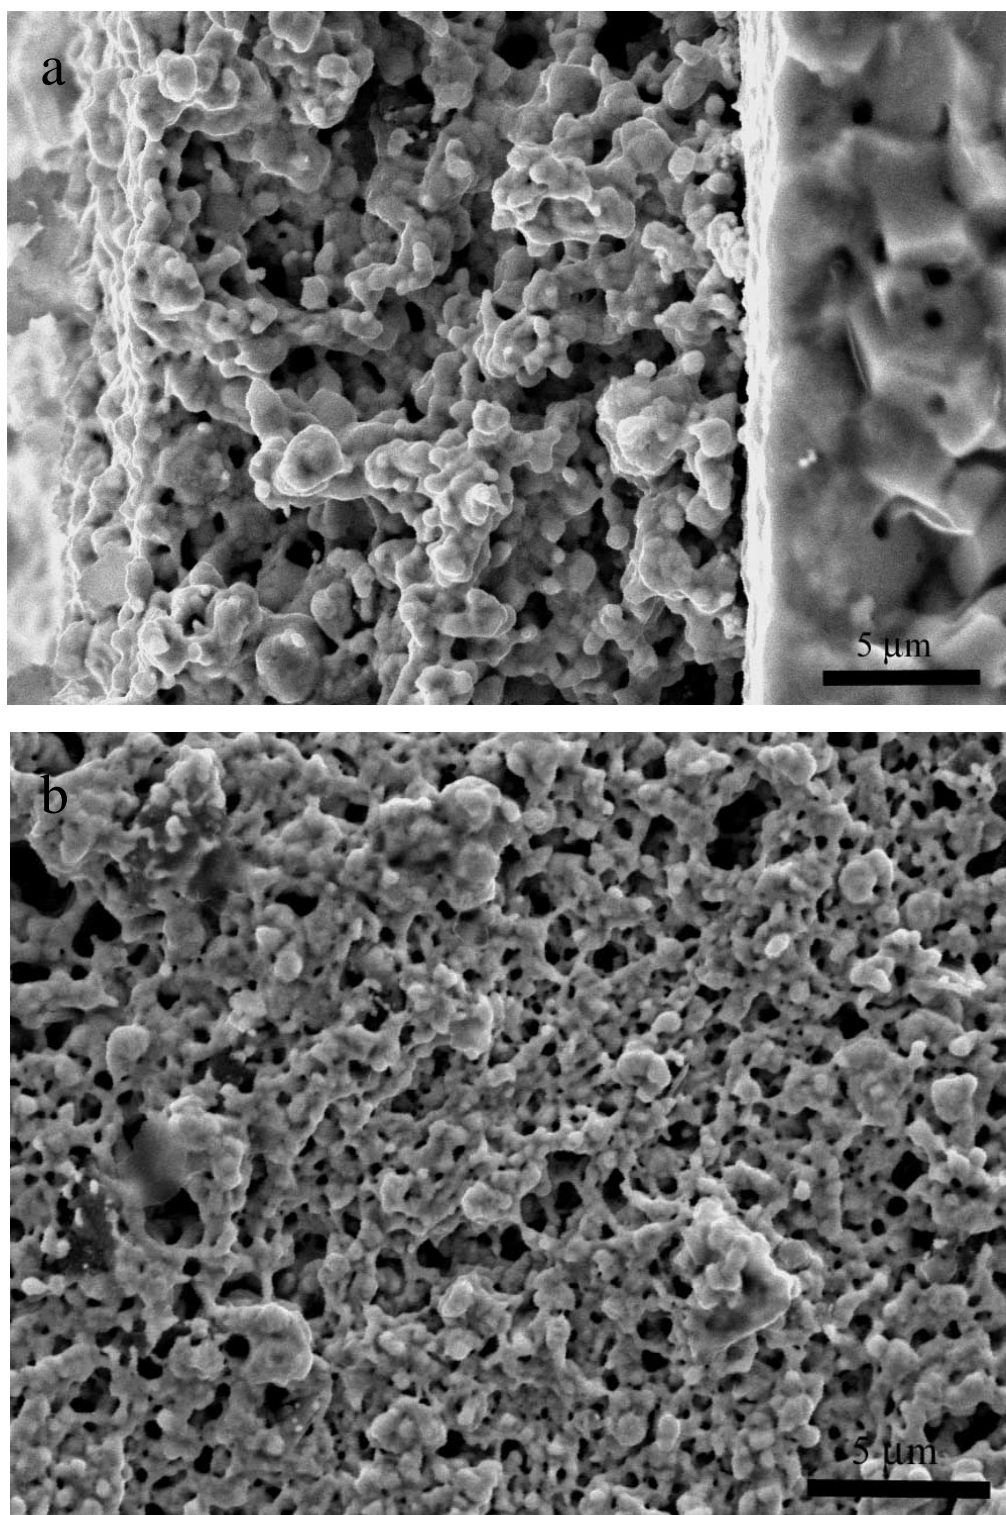

Fig. S4. (a) Cross-sectional and (b) surface SEM images of the Cu-Cr<sub>2</sub>O<sub>3</sub> anode mixed with Au paste after proton conducting membrane SOFC reactor testing.

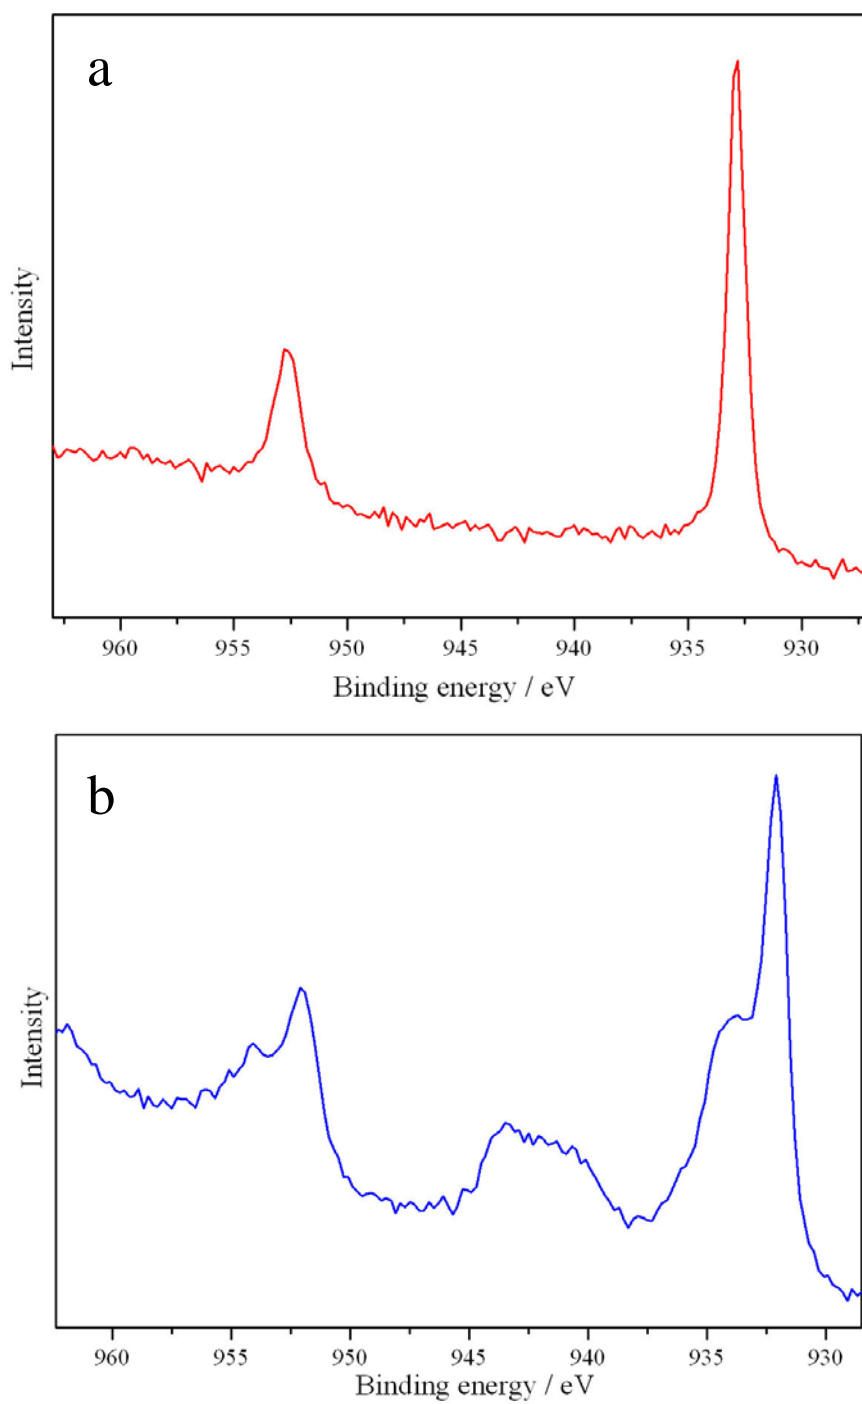

Fig. S5. XPS spectra of Cu over anode catalysts (a) before and (b) after testing.

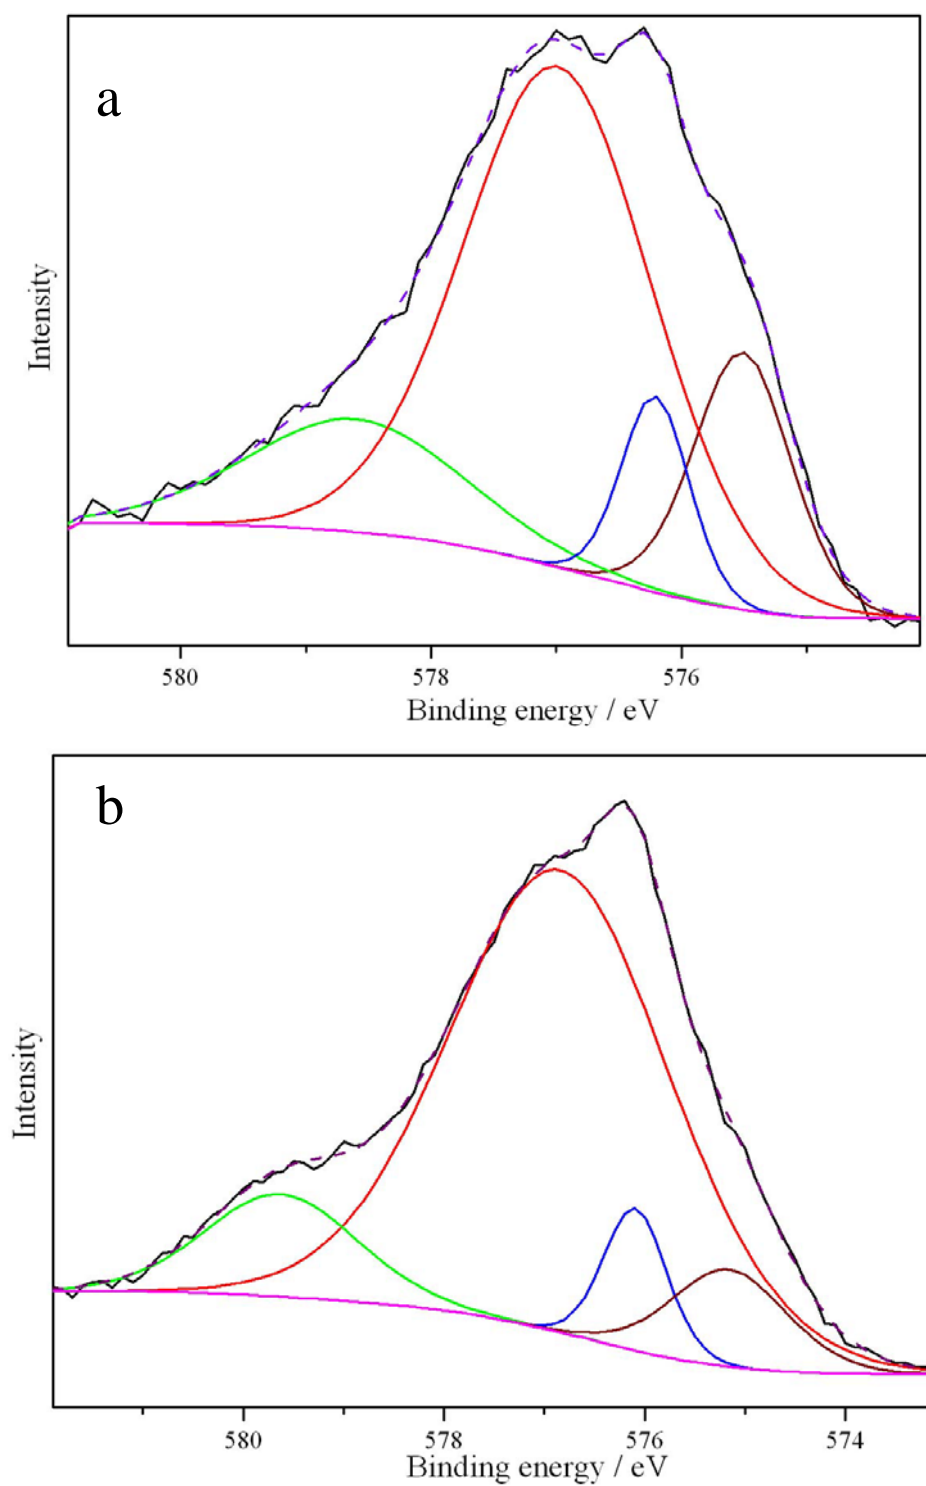

Fig. S6. XPS spectra of  $\text{Cr}2p_{3/2}$  over anode catalysts (a) before and (b) after testing.
